# Supplementary material
Source: publisher figshare collection journal article supplement (https://karger.figshare.com/ndownloader/files/13496915)
Supplement: Supplementary file 1 [file 13496915]

**Table SI. Cigarette consumption according to the presence of absence of BP and/or tattoos**

| Total n = 1357 | No piercing, No tattoo | Tattoo only | Piercing only | Piercing and tattoo |
| --- | --- | --- | --- | --- |
| Men | | | | |
| n = 738 | 507 | 110 | 47 | 74 |
| Mean age  (yo)  40.7 | 43 | 37.6 | 35.2 | 33.4 |
| Number of cigarettes smoked per day (SD)  11.3 (7.9) | 10.9 (7.8) | 13 (8.9) | 12.2 (7.2) | 11 (7.6) |
| Women | | | | |
| n = 619 | 364 | 107 | 62 | 86 |
| Mean age 42.4 | 47 | 41.2 | 31.5 | 32.1 |
| Number of cigarettes smoked per day (SD) 11.0 (6.9) | 11.4 (6.9) | 10.5 (6.5) | 10 (7.1) | 11 (7.4) |
| Total | | | | |
| n = 1357 | 871 | 217 | 109 | 160 |
| Mean age 41.5 | 44.7 | 39.4 | 33.1 | 32.7 |
| Number of cigarettes smoked per day (SD) 11.2 (7.5) | 11.2 (7.4) | 11.8 (7.9) | 11 (7.2) | 11 (7.5) |

SD: Standard Deviation

**Table SII. Distribution of tattoos and body-piercings according to gender**

|  | With tattoos | Without tattoos | Total | p value |
| --- | --- | --- | --- | --- |
| Men | 351 | 2092 | 2443 |  |
| With piercing  Without piercing | 112  239 | 94  1998 | 206  2044 | <0.0001 |
| Women | 489 | 2068 | 2557 |  |
| With piercing  Without BP | 200  289 | 195  1873 | 395  2162 | <0.0001 |
| Total | 840 | 4160 | 5000 |  |
| With piercing  Without BP | 312  528 | 289  3871 | 601  4399 | <0.0001 |

**Table SIII. Body piercings and eroticism/sexuality as a motivation**

| BP site | n (%) |
| --- | --- |
| Scrotum (n=9) | 6 (66) |
| Penis (n=12) | 5 (41.7) |
| Clitoris (n=5) | 2 (40) |
| Nipple (n=30) | 8 (26.7) |
| Tongue (n=90) | 9 (10) |
| Belly button (n=146) | 12 (8.2) |
| Inner Ear (n=79) | 6 (7.6) |
| Eyebrow (n=55) | 4 (7.3) |
| Outer Ear (n=255) | 11 (4.3) |
| Nose (n=67) | 1 (1.5) |

BP: Body piercing
